# Supplementary material for: PNA versus DNA in electrochemical gene sensing based on conducting polymers: study of charge and surface blocking effects on the sensor signal
Source: Royal Society of Chemistry journal article supplement (doi:10.1039/c7an01590a), 2017-12-19
Supplement: c7an01590a1.pdf [file c7an01590a1.pdf]

## Supporting Information:

### PNA versus DNA in electrochemical gene sensing based on conducting polymers: study of charge and surface blocking effects on the sensor signal

Bicheng Zhu<sup>a, b</sup> and Jadranka Travas-Sejdic<sup>a, b\*</sup>

1. Scanning electron microscope (SEM) measurements were performed with a Philips XL30S FEG (field emission gun) scanning electron microscope. SEM images of poly(Py-co-PAA) coated GCE and bare GCE illustrate the nanoporous morphology arising from electropolymerisation (Figure S1); no such morphologies were observed for bare electrodes (Figure S2).

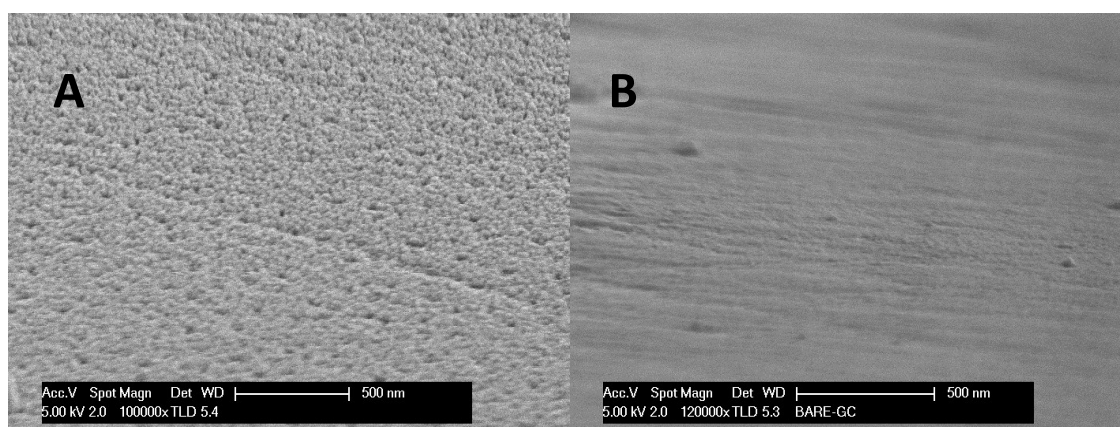

Figure S1 SEM images of (A) poly(Py-co-PAA) coated electrode; (B) bare electrode.

2. To confirm that PNA probes covalently couple to the copolymer, FTIR spectra of the post-attachment were taken. The FTIR spectra were collected between 400-4000  $\text{cm}^{-1}$  using a Bruker Vertex 70 spectrometer in absorbance mode, as shown in Figure S2. After the attachment these peaks were clearly at 1645  $\text{cm}^{-1}$  and 1632  $\text{cm}^{-1}$  respectively, corresponding to the amide C=O stretch of PNA indicative of  $\text{NH}_2$ -PNA coupling to the carboxylic acid functionalised copolymer, when comparing with the FTIR spectra from poly(Py-co-PAA). The broad peak between 3000  $\text{cm}^{-1}$  and 3700  $\text{cm}^{-1}$ , arising from the N-H stretch, is also suggestive of amide bond formation and addition of PNA.

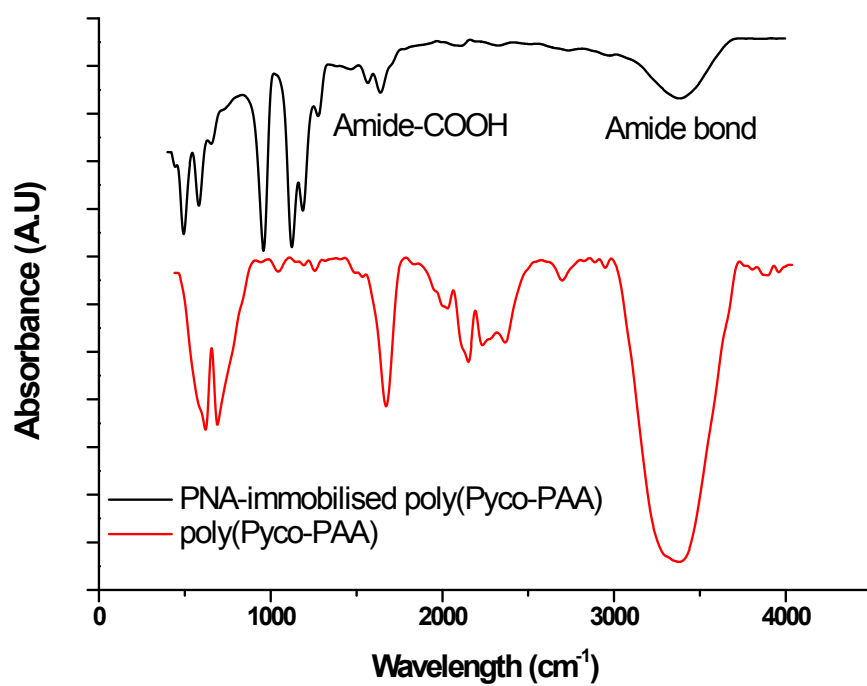

Figure S2 FTIR spectra PNA-immobilised poly(Py-co-PAA)-modified and poly(Py-co-PAA) modified GCE.
